# Supplementary material for: Controlled synthesis and characterisation of MgOnanoparticles, thin films and polycrystalline nanorods derived from a Mg(ii) single source precursor
Source: Royal Society of Chemistry journal article supplement (doi:10.1039/b917715a), 2009-12-10
Supplement: b917715a.pdf [file b917715a.pdf]

## A molecular Mg(II) single source precursor for MgO. Synthesis and characterisation of MgO nanoparticles, MgO thin films and polycrystalline MgO nanorods.

Mikhail Pashchanka, Rudolf C. Hoffmann, and Jörg J. Schneider\*

### Supplementary information

#### Complete discussion of the gaseous decomposition products from polycarbonate membrane:

The scheme of decomposition can be summarily expressed as follows:

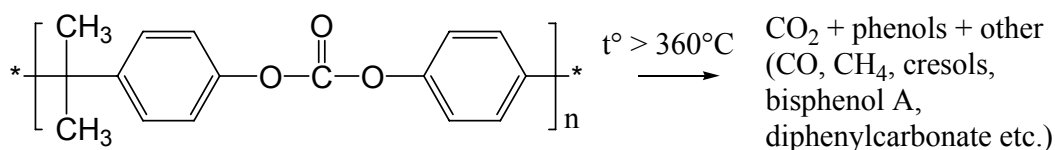

The release of gaseous products from Whatman Nuclepore™ templates and the corresponding sharp increase of ionic currents was detected via mass-spectrometry in the temperature interval between 400 and 600 °C.

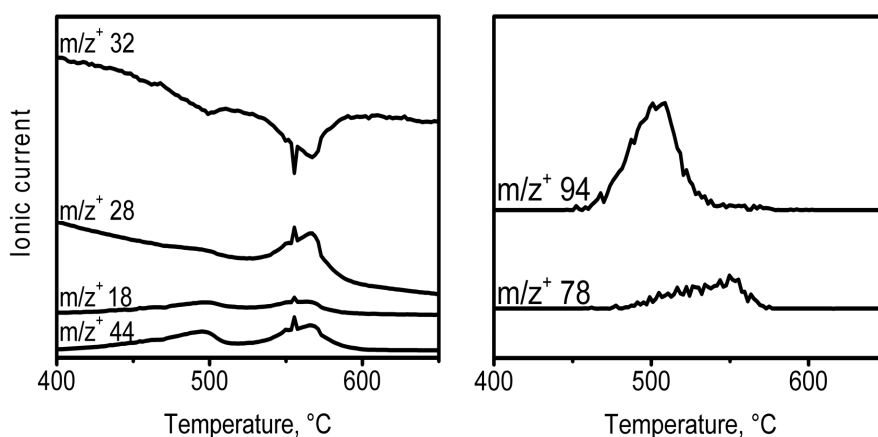

**Figure 1:** Qualitative MS curves of the commercial polymeric porous membranes analysed in oxidizing atmosphere.

First, water ( $\text{H}_2\text{O}$ ,  $m/z^+$  18) and carbon dioxide ( $\text{CO}_2$ ,  $m/z^+$  44) is released, presumably, not only from decomposed polymer but also including gas and moisture adsorbed in the pores. Some decrease of the ionic current corresponding to oxygen ( $\text{O}_2$ ,  $m/z^+$  32) is observed, as it is consumed during oxidative processes. The further reaction is accompanied by the significant release of carbon monoxide ( $\text{CO}$ ,  $m/z^+$  28), and detectable amounts of benzene ( $\text{C}_6\text{H}_6$ ,  $m/z^+$  78) and phenol ( $\text{C}_6\text{H}_5\text{OH}$ ,  $m/z^+$  94).

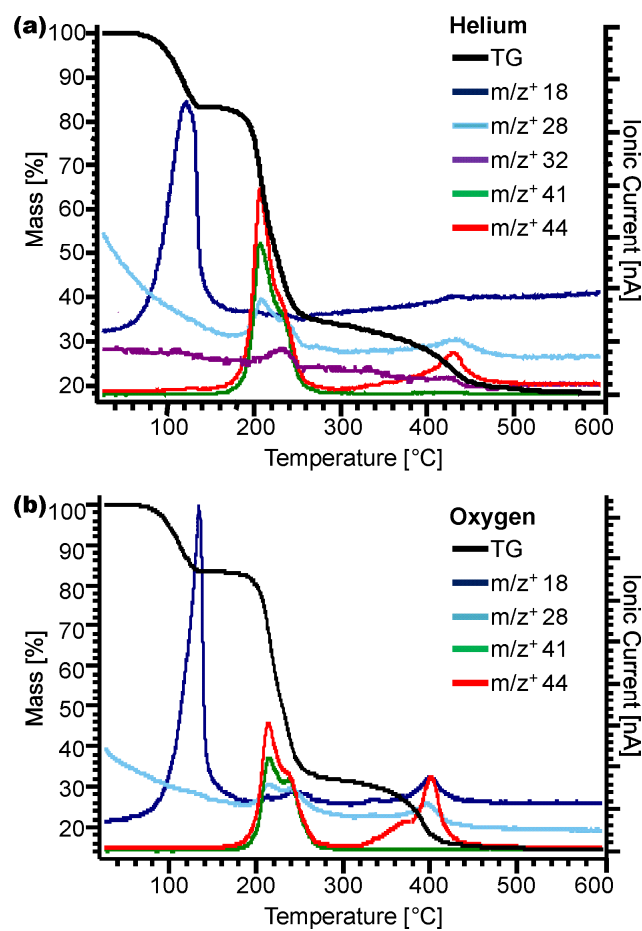

**Figure 2:** TG-coupled MS of Tris(aquo)-bis[2-(methoxyimino)propanato]magnesium in (a) helium and (b) oxygen atmosphere.

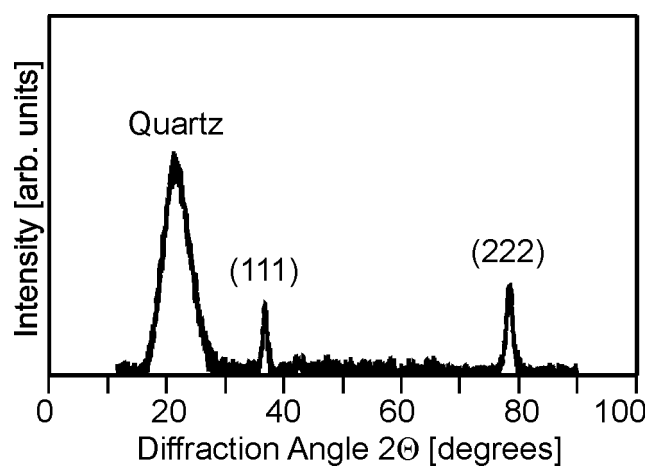

**Figure 3:** Grazing incidence XRD (*including automated background subtraction*) of MgO film on quartz (thickness about 270 nm) obtained by repeated spincoating of 12 layers on quartz and annealing at 210°C, followed by calcination at 450°C. Background subtraction was carried out using the routine provided by the program Match!, version 1.9d from Crystal Impact.

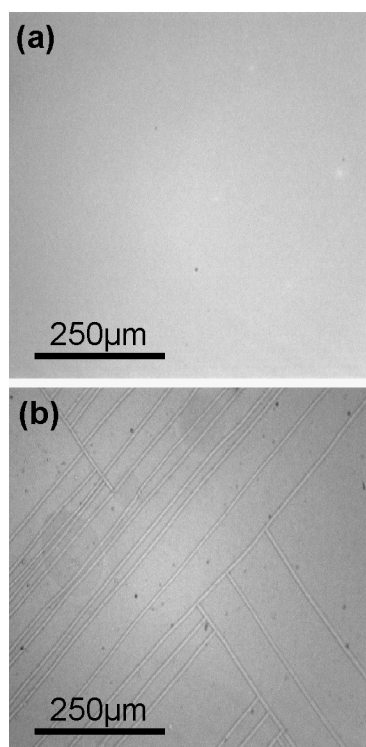

**Figure 4:** Optical micographs of MgO film on quartz (thickness about 110 nm) obtained by repeated spincoating of 5 layers on quartz and annealing at 210°C, followed by calcination at 450°C; (a) cooling rate > 10 K/h (furnace characteristic); (b) quenching to room temperature.

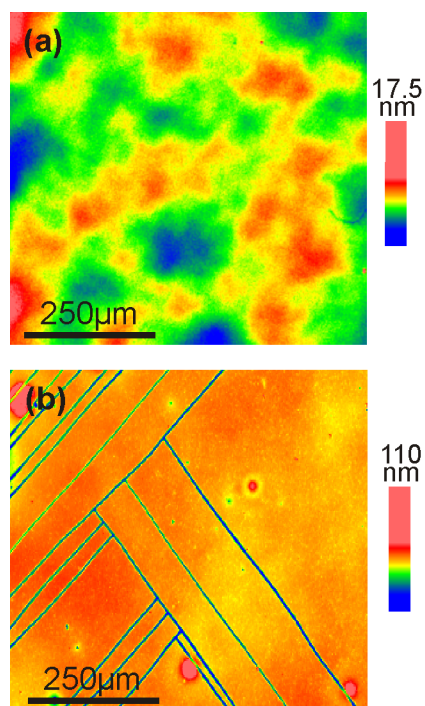

**Figure 5:** Images from optical profilometry corresponding to samples in Figure 4.

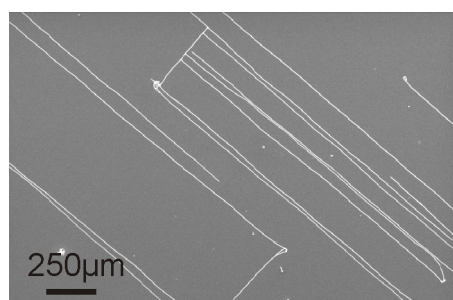

**Figure 6:** SEM image of MgO film on quartz (thickness about 110 nm) obtained by repeated spincoating of 5 layers on quartz and annealing at 210°C, followed by calcination at 450°C. Break lines obtained by quenching to room temperature.

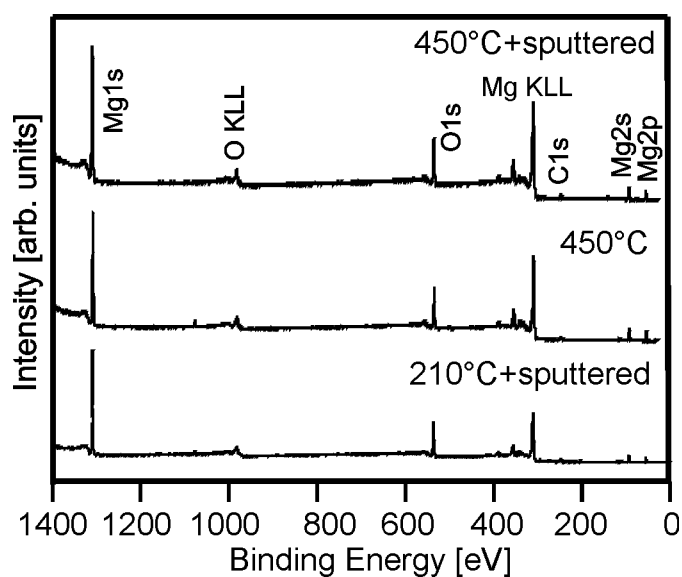

**Figure 7:** XPS survey spectra of MgO films after calcination at different temperatures for 1 hour. Samples treated with additional argon sputtering in the vacuum chamber are mentioned in the figure.

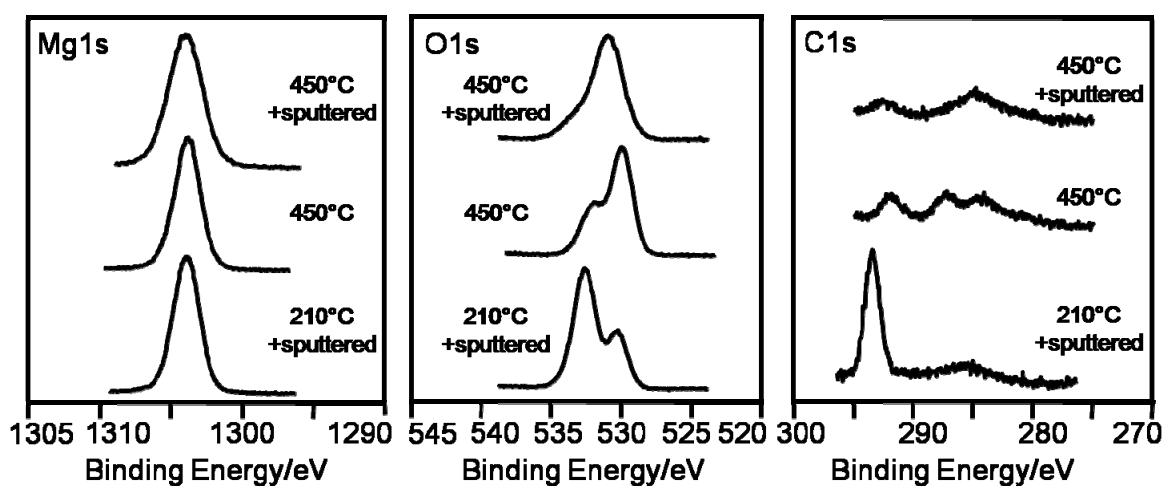

**Figure 8:** XPS spectra of Mg 1s, O 1s and C 1s signals of films after calcination at different temperatures for 1 hour. Samples treated with additional argon sputtering in the vacuum chamber are mentioned in the legend.
